# Supplementary material for: SpotLight Proteomics: uncovering the hidden blood proteome improves diagnostic power of proteomics
Source: PubMed Central journal article supplement (PMC5294601; doi:10.1038/srep41929), 2017-02-07
Supplement: srep41929-s1.pdf [file srep41929-s1.pdf]

## **Supplementary information**

### **SpotLight Proteomics: uncovering the hidden blood proteome improves diagnostic power of proteomics**

Susanna L. Lundström, Bo Zhang, Dorothea Rutishauser, Dag Aarsland, Roman A. Zubarev

**Supplementary Table 1:** Excel file

**Supplementary Table 2:** Page 2

**Supplementary Table 3:** Excel file

**Supplementary Table 4:** Excel file

**Supplementary Table 5:** Page 3

**Supplementary Table 6:** Excel file

**Supplementary Table 7:** Excel file

**Supplementary Table 8:** Page 4

**Supplementary Figure 1:** Page 5

**Supplementary Figure 2:** Page 6

**Supplementary Figure 3:** Page 7

**Supplementary Figure 4:** Page 8

**Supplementary Figure 5:** Page 9

**Supplementary Figure 6:** Page 10

**References:** Page 11

**Supplementary Table 2. Predictive power of proteins and peptides derived from the MG-extraction- and proteomics approach.** Mean and standard deviations of the Predicted scores (tPS) of the Group B patients (treated as unknowns) and nine PD patients (treated as unknowns) in the OPLS-DA models based on differences in the AD- and DLB-Group A patients.

| Content         | Sample Set | Domain              | DLB <sup>A</sup><br>n=23 | AD <sup>B</sup><br>n=73 | PD <sup>C</sup><br>n=9 | AD vs DLB<br>p-value | AD vs [DLB and PD]<br>p-value | ROC <sup>D</sup><br>AUC <sup>E</sup> | n    |
|-----------------|------------|---------------------|--------------------------|-------------------------|------------------------|----------------------|-------------------------------|--------------------------------------|------|
| Proteins        | Full Model |                     | -1.3±2.4                 | 1.2±1.5                 | -2.1±1.9               | 8.5E-05              | 2.3E-07                       | 0.85                                 | 237  |
|                 | Melon Gel  |                     | -1.8±2.5                 | 0.2±2.3                 | -0.9±3.1               | 6.8E-04              | 9.9E-04                       | 0.66                                 | 81   |
|                 | Proteome   |                     | -0.9±1.9                 | 1.2±1.3                 | -1.4±1.2               | 3.9E-05              | 1.0E-10                       | 0.85                                 | 156  |
| Peptides        | Full Model |                     | -7.0±9.0                 | 6.6±5.3                 | -7.3±4.9               | 2.1E-07              | 2.4E-11                       | 0.94                                 | 4708 |
|                 | Melon Gel  | IgGome, MG proteins | -8.3±9.3                 | 4.7±7.6                 | -3.7±6.6               | 1.3E-09              | 4.9E-10                       | 0.84                                 | 2129 |
|                 |            | IgGome              | -2.5±4.7                 | 2.7±3.6                 | -1.4±2.8               | 2.4E-07              | 2.6E-08                       | 0.82                                 | 646  |
|                 |            | MG proteins         | -8.0±8.4                 | 3.9±6.8                 | -3.4±6.4               | 4.8E-10              | 3.1E-10                       | 0.84                                 | 1431 |
|                 |            | Fc-glycopeptides    | -0.7±1.8                 | 0.9±2.1                 | -2.3±2.8               | 7.4E-01              | 5.2E-01                       | 0.53                                 | 52   |
|                 | Proteome   | Proteome            | -1.9±5.0                 | 4.6±4.0                 | -7.0±2.6               | 6.3E-09              | 7.1E-14                       | 0.88                                 | 2579 |
| New sequences   | Full Model |                     | -4.7±7.5                 | 4.9±4.2                 | -6.7±4.3               | 3.3E-06              | 8.1E-10                       | 0.90                                 | 1997 |
|                 | Melon Gel  | IgGome, MG proteins | -4.8±7.6                 | 4.5±5.6                 | -2.6±4.4               | 7.1E-09              | 5.6E-10                       | 0.84                                 | 1213 |
|                 |            | IgGome              | -2.1±4.4                 | 2.5±3.3                 | -1.3±2.2               | 4.3E-07              | 3.0E-08                       | 0.82                                 | 507  |
|                 |            | MG proteins         | -4.2±6.7                 | 3.9±4.8                 | -2.0±4.3               | 8.0E-06              | 9.2E-10                       | 0.84                                 | 706  |
|                 | Proteome   | Proteome            | -1.2±4.2                 | 3.0±2.5                 | -5.1±2.1               | 8.9E-05              | 2.6E-08                       | 0.85                                 | 784  |
| Known sequences | Full Model |                     | -4.5±5.9                 | 4.6±4.3                 | -3.1±4.1               | 3.7E-12              | 5.2E-14                       | 0.92                                 | 2659 |
|                 | Melon Gel  | IgGome, MG proteins | -5.8±7.1                 | 2.6±6.4                 | 1.5±6.9                | 4.9E-07              | 1.2E-06                       | 0.76                                 | 864  |
|                 |            | IgGome              | -1.2±2.0                 | 1.1±1.8                 | -0.3±2.0               | 1.2E-06              | 1.3E-06                       | 0.77                                 | 139  |
|                 |            | MG proteins         | -3.9±5.7                 | 2.8±4.1                 | -0.1±4.9               | 1.2E-05              | 6.6E-06                       | 0.78                                 | 725  |
|                 | Proteome   | Proteome            | -1.1±3.6                 | 3.6±3.9                 | -4.0±2.9               | 2.0E-06              | 9.0E-10                       | 0.84                                 | 1795 |

<sup>A</sup>Dementia with Lewy Bodies, <sup>B</sup>Alzheimer's disease, <sup>C</sup>Parkinson's Disease, <sup>D</sup>Receiver operating characteristic, <sup>E</sup>Area Under Curve

**Supplementary Table 5.** Significant differences in CV-scores between the DLB and AD patients split up according to ApoE-genotype (E2-E3 and E3-E3 versus E3-E4 and E4-E4).

| Content        | Sample set | Domain               | Differences ApoE |                |                                      |         |
|----------------|------------|----------------------|------------------|----------------|--------------------------------------|---------|
|                |            |                      | AD vs DLB+PD     |                | (E2-E3 or E3-E3) vs (E3-E4 or E4-E4) |         |
|                |            |                      | E2-E3 or E3-E3   | E3-E4 or E4-E4 | AD                                   | DLB+PD  |
| Proteins       | Full Model |                      | 1.6E-05          | 3.8E-16        | 1.4E-01                              | 1.5E-02 |
|                | Melon Gel  |                      | 8.6E-04          | 5.7E-08        | 6.8E-01                              | 4.9E-01 |
|                | Proteome   |                      | 5.9E-04          | 7.2E-18        | 1.0E-01                              | 8.8E-03 |
| Peptides       | Full Model |                      | 3.4E-07          | 1.0E-13        | 5.7E-02                              | 7.5E-02 |
|                | Melon Gel  | IgGome + MG proteins | 2.0E-05          | 2.5E-09        | 7.8E-03                              | 5.0E-01 |
|                |            | IgGome               | 9.5E-04          | 2.7E-11        | 2.5E-02                              | 3.3E-01 |
|                |            | MG proteins          | 5.6E-05          | 3.1E-08        | 1.5E-01                              | 3.4E-01 |
|                |            | Fc-glycans           | 4.5E-02          | 1.8E-03        | 1.4E-02                              | 7.5E-01 |
|                | Proteome   |                      | 1.0E-05          | 2.5E-20        | 2.0E-02                              | 2.2E-01 |
| New sequenes   | Full Model |                      | 1.9E-05          | 3.3E-18        | 1.3E-03                              | 1.2E-01 |
|                | Melon Gel  | IgGome + MG proteins | 1.3E-04          | 3.6E-13        | 2.9E-02                              | 1.7E-01 |
|                |            | IgGome               | 2.1E-03          | 1.6E-07        | 8.2E-03                              | 5.1E-01 |
|                |            | MG proteins          | 4.9E-05          | 2.5E-13        | 2.5E-02                              | 1.7E-01 |
|                | Proteome   |                      | 4.7E-04          | 1.1E-16        | 1.4E-03                              | 5.4E-01 |
| Known sequenes | Full Model |                      | 2.9E-06          | 1.4E-13        | 5.3E-02                              | 2.1E-01 |
|                | Melon Gel  | IgGome + MG proteins | 8.4E-05          | 2.9E-08        | 8.4E-02                              | 6.2E-01 |
|                |            | IgGome               | 1.3E-03          | 1.1E-09        | 2.1E-02                              | 5.2E-01 |
|                |            | MG proteins          | 7.6E-05          | 1.5E-10        | 1.3E-01                              | 6.6E-01 |
|                | Proteome   |                      | 1.0E-05          | 1.9E-17        | 7.6E-02                              | 2.9E-01 |

**Supplementary Table 8.** Fc-glycan distribution in the AD and DLB patients. Given p-values are not Bonferroni corrected. Due to polymorphism IgG<sub>3</sub> can be found as either EEQYNSTFR or EEQFNSTFR, (the latter particularly common in caucasians)<sup>1</sup>. Also note that peptides EEQYNSTFR (IgG<sub>3</sub>) and EEQFNSTYR (IgG<sub>4</sub>) comes at the same retention time and has the same mass (i.e. we can not distinguish them). Note that this likely is the main reason why the variation in particularly IgG<sub>3/4</sub> is quite high. (Since IgG<sub>2</sub> is more abundant than IgG<sub>3</sub> the IgG<sub>2/3</sub> values are less affected).

| Suggested structure <sup>a</sup> | Composition <sup>b</sup>       | IgG <sub>1</sub><br>EEQYNSTYR<br>TKPREEQYNSTYR |          |         | IgG <sub>2/3</sub><br>EEQFNSTFR<br>TKPREEQFNSTFR |           |              | IgG <sub>4/3</sub><br>EEQYNSTFR or EEQFNSTYR<br>TKPREEQYNSTFR or TKPREEQFNSTYR |           |             |
|----------------------------------|--------------------------------|------------------------------------------------|----------|---------|--------------------------------------------------|-----------|--------------|--------------------------------------------------------------------------------|-----------|-------------|
|                                  |                                | AD                                             | DLB      | p-value | AD                                               | DLB       | p-value      | AD                                                                             | DLB       | p-value     |
| A2                               | HexNAc(4)Hex(3)                | 1.5±0.9                                        | 1.5±0.9  | 0.9     | 2.5±2.0                                          | 2.5±2.1   | 1.0          | 0.3±0.4                                                                        | 0.6±0.8   | 0.1         |
| FA1                              | dHex(1)HexNAc(3)Hex(3)         | 0.3±0.1                                        | 0.3±0.2  | 0.5     | 0.9±0.4                                          | 1.1±0.6   | 0.1          | 0.5±3.8                                                                        | 0.2±0.2   | 0.4         |
| FA2                              | dHex(1)HexNAc(4)Hex(3)         | 23.6±6.9                                       | 23.3±6.9 | 0.8     | 35.7±7.7                                         | 37.2±7.2  | 0.3          | 31.4±10.1                                                                      | 32.0±10.3 | 0.7         |
| A2G1                             | HexNAc(4)Hex(4)                | 2.0±1.3                                        | 2.0±1.1  | 0.7     | 2.5±2.8                                          | 1.8±1.3   | <b>0.04</b>  | -                                                                              | -         | -           |
| FA1G1                            | dHex(1)HexNAc(3)Hex(4)         | 0.1±0.1                                        | 0.1±0.1  | 0.4     | 0.2±0.1                                          | 0.3±0.2   | <b>0.02</b>  | 0.04±0.1                                                                       | 0.1±0.1   | 0.2         |
| FA2G1                            | dHex(1)HexNAc(4)Hex(4)         | 26.4±4.7                                       | 25.8±4.6 | 0.5     | 23.8±4.8                                         | 23.8±4.4  | 1.0          | 18.3±5.8                                                                       | 19.2±5.4  | 0.4         |
| FA2G2                            | dHex(1)HexNAc(4)Hex(5)         | 10.4±3.5                                       | 10.1±3.4 | 0.7     | 6.7±2.4                                          | 6.6±2.2   | 0.8          | 14.1±16.2                                                                      | 10.7±11.6 | 0.1         |
| A2G2                             | HexNAc(4)Hex(5)                | 0.8±0.6                                        | 0.8±0.6  | 0.9     | 1.0±1.0                                          | 0.9±0.6   | 0.5          | -                                                                              | -         | -           |
| FA2G1S                           | dHex(1)HexNAc(4)Hex(4)NeuAc(1) | 1.4±1.7                                        | 1.3±0.6  | 0.5     | 2.8±1.3                                          | 3.1±1.0   | 0.1          | 1.9±1.1                                                                        | 1.9±0.9   | 0.9         |
| FA1G1S1                          | dHex(1)HexNAc(3)Hex(4)NeuA(1)  | 0.1±0.1                                        | 0.1±0.1  | 0.8     | 0.4±0.3                                          | 0.8±1.0   | <b>0.003</b> | 0.3±0.6                                                                        | 0.5±0.7   | 0.3         |
| FA2G2S1                          | dHex(1)HexNAc(4)Hex(5)NeuAc(1) | 5.0±1.9                                        | 5.6±2.2  | 0.1     | 3.0±1.6                                          | 3.1±1.5   | 0.8          | 4.2±2.8                                                                        | 3.9±2.4   | 0.6         |
| FA2G2S2                          | dHex(1)HexNAc(4)Hex(5)NeuAc(2) | 0.4±0.7                                        | 0.3±0.3  | 0.2     | 0.1±0.3                                          | 0.02±0.02 | 0.2          | 0.7±1.9                                                                        | 0.9±1.9   | 0.6         |
| A2B                              | HexNAc(5)Hex(3)                | 0.8±0.5                                        | 0.9±0.6  | 0.3     | 0.5±0.3                                          | 0.4±0.2   | 0.2          | 2.8±4.4                                                                        | 7.0±10.3  | <b>0.01</b> |
| FA2B                             | dHex(1)HexNAc(5)Hex(3)         | 11.8±4.3                                       | 12.3±4.7 | 0.5     | 13.9±4.1                                         | 12.9±3.0  | 0.1          | 16.5±5.8                                                                       | 14.9±6.3  | 0.1         |
| FA2BG1                           | dHex(1)HexNAc(5)Hex(4)         | 13.5±3.8                                       | 13.7±3.6 | 0.7     | 5.8±2.4                                          | 5.2±1.9   | 0.1          | 7.6±2.8                                                                        | 6.2±3.3   | <b>0.01</b> |
| FA2BG2                           | dHex(1)HexNAc(5)Hex(5)         | 1.6±1.0                                        | 1.5±0.7  | 0.5     | 0.2±0.6                                          | 0.2±0.3   | 0.3          | 0.9±0.7                                                                        | 1.0±0.8   | 0.5         |
| FA2BG1S1                         | dHex(1)HexNAc(5)Hex(4)NeuAc(1) | 0.2±0.1                                        | 0.2±0.2  | 0.8     | 0.1±0.2                                          | 0.05±0.04 | 0.3          | 0.2±0.3                                                                        | 0.8±1.5   | <b>0.01</b> |
| FA2BG2S1                         | dHex(1)HexNAc(5)Hex(5)NeuAc(1) | 0.1±0.1                                        | 0.1±0.2  | 0.8     | 0.1±0.1                                          | 0.1±0.1   | 0.3          | 0.1±0.1                                                                        | 0.4±1.1   | 0.1         |
| FA2BG2S2                         | dHex(1)HexNAc(5)Hex(5)NeuAc(2) | -                                              | -        | -       | -                                                | -         | -            | -                                                                              | -         | -           |

<sup>a</sup>Glycan nomenclature is described by Royle et al <sup>2</sup>. A2 is defined as the core heptasaccharide moiety which can be further substituted by fucose (F), galactose (G) and sialic acid (S). B indicates a bisecting N-acetylglucosamine unit linked to A2. <sup>b</sup> Sugar composition for respective structure; N-acetyl-glucosamine (HexNAc), Hexose (Hex), Deoxy hexose (dHex) Neuraminic acid (NeuAc).

**Supplementary Figure 1. Distributions between the peptides identified by database search and de novo sequenced peptides.** (A) The distribution between total number of quantified peptides identified by database search (n=1310) and de novo sequenced peptides (n=1709). Median abundances (in log<sub>10</sub> scale) are 6.08 for known peptides and 6.08 for de novo peptides. As expected, most of the highly abundant peptides are known. (B) The distribution between filtered peptides quantified in ≥50% of respective cohort. 864 peptides were identified by database search and 1213 by de novo sequencing. Median abundances (in log<sub>10</sub> scale) are 6.97 for known peptides and 6.33 for de novo peptides. Median abundances (in log<sub>10</sub> scale) are 6.47 for known peptides and 6.33 for de novo peptides. As expected, most of the highly abundant peptides are known.

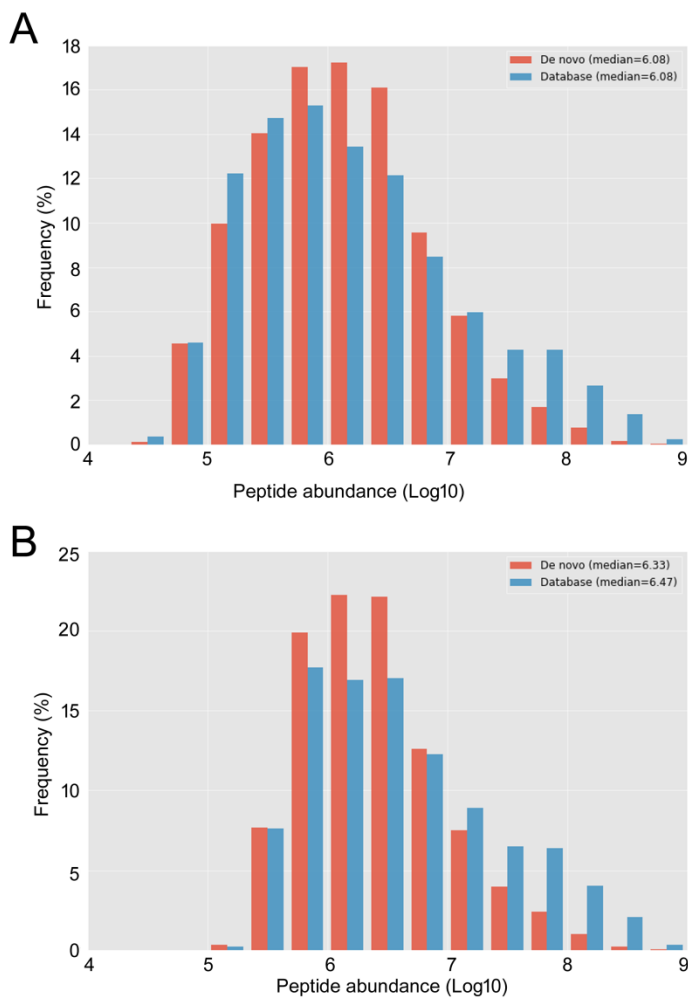

**Supplementary Figure 2. Overview and correlation between the data sets. (A)** Distributions and numbers of known and de novo sequenced peptides derived from the Melon Gel and Proteomics approaches. Peptides were grouped according to conserved and variable IgG regions as well as peptides with no sequence homology to IgG (i.e. other peptides). Variable peptides are divided into heavy variable (HV), kappa variable (KV) and lambda variable (LV) peptides, respectively. **(B)** The correlation between the average reference abundance of IgGome peptides quantified in both the proteome and Melon Gel enriched fractions. **(C)** The same correlation for peptides quantified in both matrixes but with no IgG sequence homology.

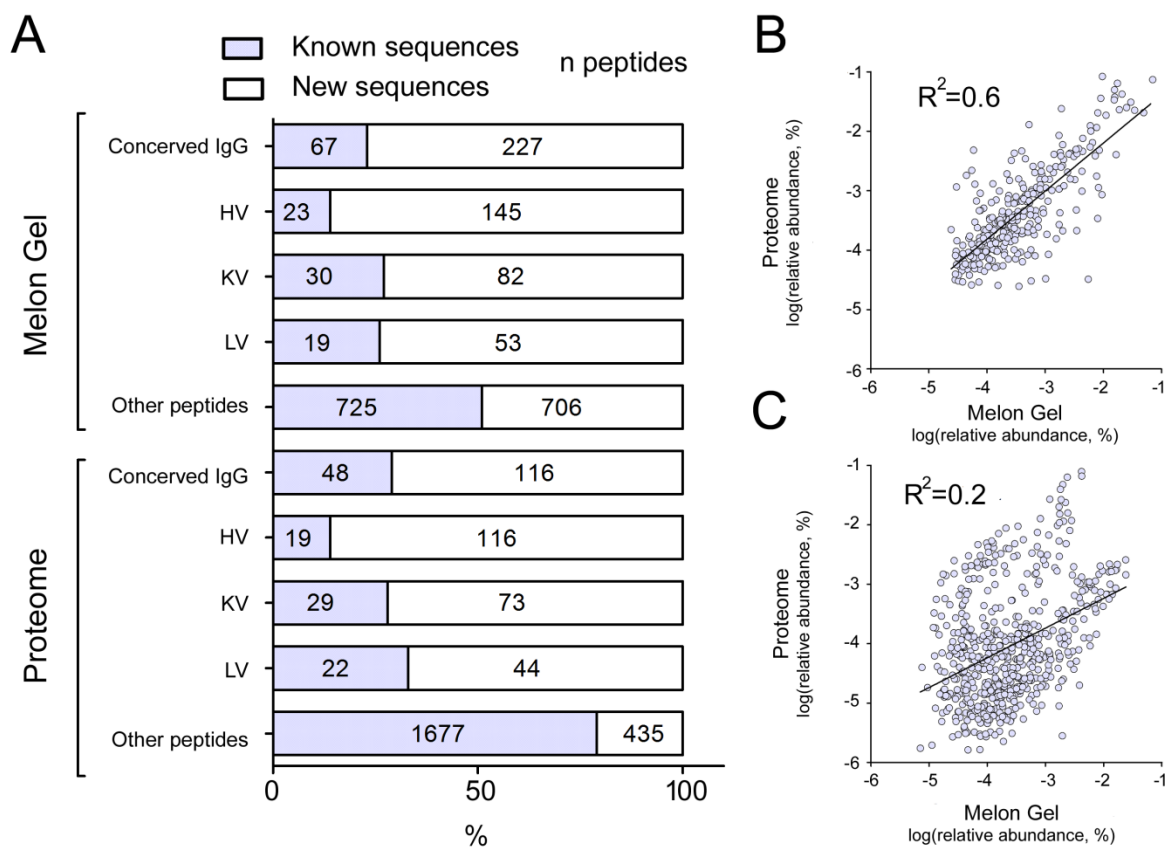

**Supplementary Figure 3.** PCA scores plot based on the complete data set and all patients ( $R^2=0.51$ ,  $Q^2=0.21$ , 23 components). The figure shows component 3 and component 5 for which the best separation between the groups was observed.

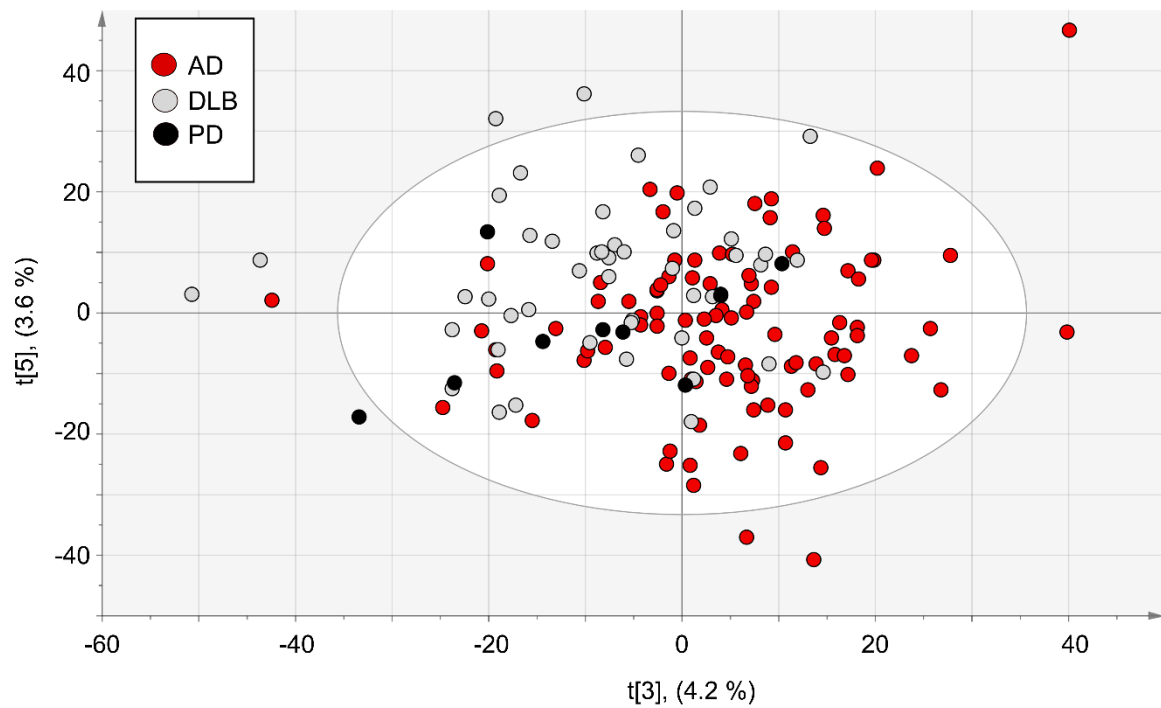

**Supplementary Figure 4.** Peptides derived from the FR3 region of HV3. The model is the same as in Figure 3B but with only the FR3-HV3 peptides shown. The HV3 chain FR3 peptide NTLYLQMGNSLR (Table 2) is specific for the AD cohort. In contrast, all 11 other peptides from this region correlate with the DLB cohort. Only the AD peptide remains significant following Bonferroni Correction ( $p=1.9E-06$ ).

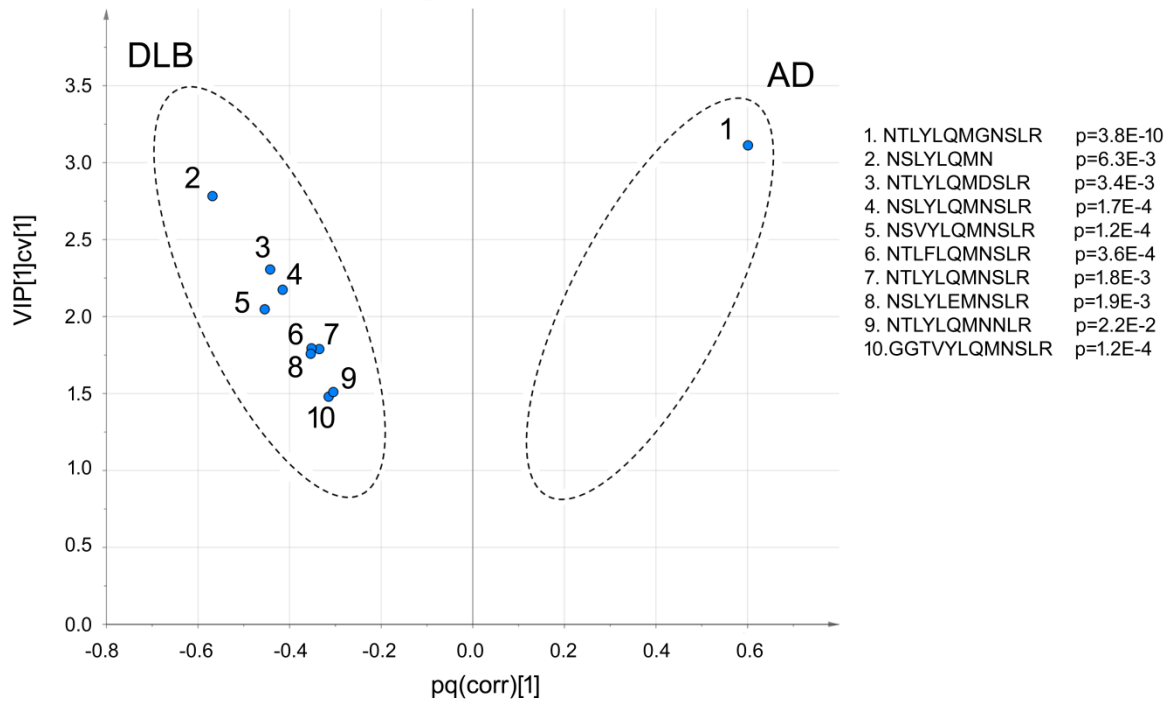



**Supplementary Figure 5.** Examples of the predictability of some of the proteins and peptides in the intact and Melon Gel proteomes

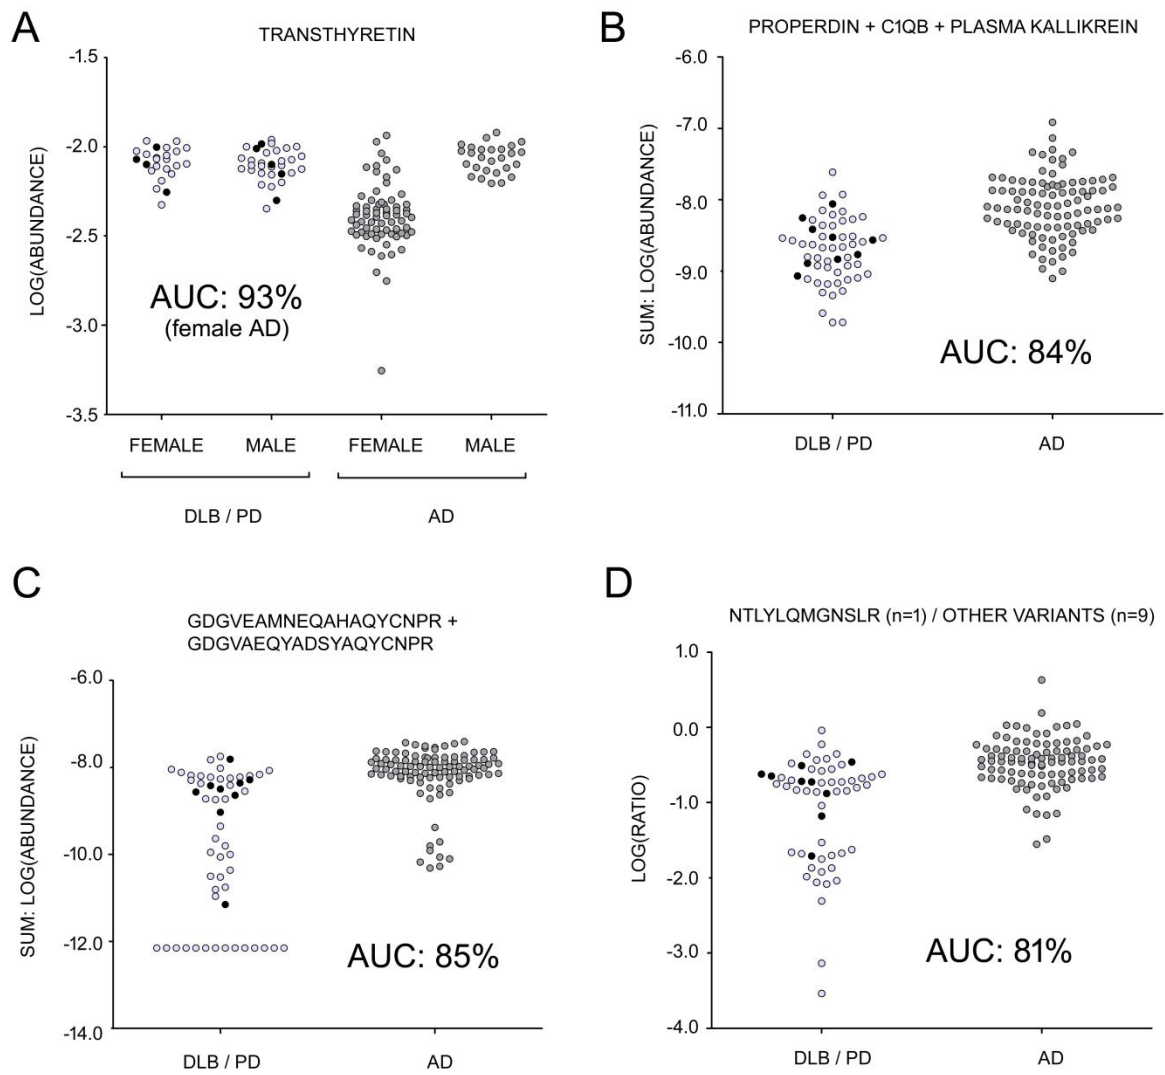

**Supplementary Figure 6.** SDS-PAGE Gel analysis of human plasma, human polyclonal IgG and pooled MG extracted IgG from the patients. In addition to IgG heavy and light chains, particularly serrotransferrin is consistently found in relatively high abundance following the IgG extraction in the MG enriched samples.

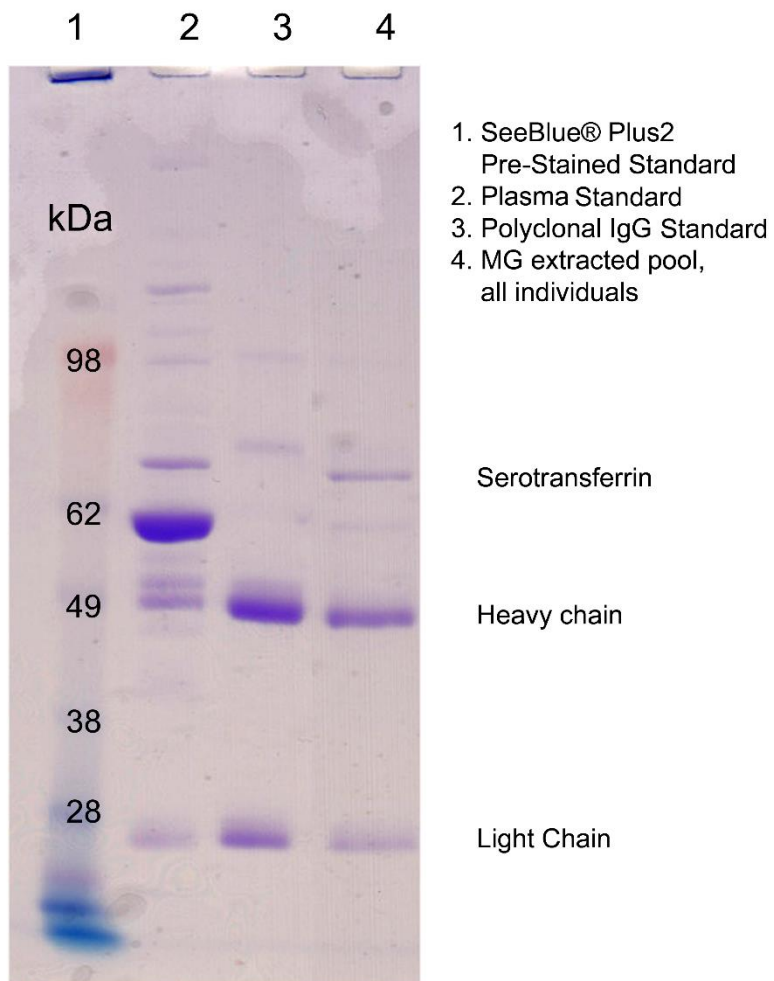

## References

1. Balbin, M., Grubb, A., de Lange, G.G. & Grubb, R. DNA sequences specific for Caucasian G3m(b) and (g) allotypes: allotyping at the genomic level. *Immunogenetics* **39**, 187-193 (1994).
2. Royle, L., *et al.* HPLC-based analysis of serum N-glycans on a 96-well plate platform with dedicated database software. *Anal Biochem* **376**, 1-12 (2008).
